# Supplementary material for: Standing Genetic Diversity and Transmission Bottleneck Size Drive Adaptation in Bacteriophage Qβ
Source: MDPI journal article supplement (doi:10.3390/ijms23168876), 2022-08-09
Supplement: s1 [file s1]

**Table S4.** Values for the parameters  $Nt$ ,  $N_0$ ,  $H_0$ ,  $N$ , and  $H$  in the amplicons obtained for Q $\beta$ -t2 and Q $\beta$ -t25.

| Population                 | Amplicon <sup>1</sup> | $Nt$ <sup>2</sup> | $N_0$ <sup>3</sup> | $H_0$ <sup>4</sup> | $N$ <sup>5</sup> | $H$ <sup>6</sup> |
|----------------------------|-----------------------|-------------------|--------------------|--------------------|------------------|------------------|
| Q $\beta$ -t2              | 1                     | 324304            | 309124             | 13688              | 266858           | 30               |
| Q $\beta$ -t2              | 2                     | 379763            | 358986             | 26127              | 294855           | 49               |
| Q $\beta$ -t2              | 3                     | 277476            | 262456             | 15078              | 223334           | 39               |
| Q $\beta$ -t25<br>Sample 1 | 1                     | 286318            | 274466             | 14710              | 235849           | 84               |
| Q $\beta$ -t25<br>Sample 2 | 2                     | 380690            | 359406             | 31345              | 279452           | 71               |
| Q $\beta$ -t25<br>Sample 3 | 3                     | 439189            | 408717             | 20728              | 351353           | 75               |

<sup>1</sup>Amplicons corresponding to population Q $\beta$ -t2 were obtained in the same sequencing project as the sample 1 of Q $\beta$ -t25 (see Figure S1). <sup>2</sup>Total number of paired reads obtained per amplicon. <sup>3</sup>Paired reads per amplicon after bioinformatics processing (see section 4.7 in Materials and Methods). <sup>4</sup>Number of different haplotypes contained in  $N_0$ . <sup>5</sup>Number of reads containing haplotypes represented above a frequency of 0.05% in  $N_0$ . <sup>6</sup>Number of different haplotypes in  $N$ .
