# Supplementary material for: Standing Genetic Diversity and Transmission Bottleneck Size Drive Adaptation in Bacteriophage Qβ
Source: MDPI journal article supplement (doi:10.3390/ijms23168876), 2022-08-09
Supplement: s1 [file s1]

**Table S3.** Sequence of the primers used to prepare single mutants through site-directed mutagenesis.

| <b>Mutant</b>               | <b>Primers<sup>1</sup></b>                                                                                |
|-----------------------------|-----------------------------------------------------------------------------------------------------------|
| Q $\beta$ <sub>A2187C</sub> | 5'-TCGATAAAATGCTTATTGCTCTCTTCGCGATATTGCGGCC-3'<br>5'-GGCCGCAATATCGCGAAGAGAGCAATAAGCATTTATCGA-3'           |
| Q $\beta$ <sub>A1088G</sub> | 5'-GTCAGCTATATCATAATATCGGTATTGTAGACGGCTTTGACAG-3'<br>5'-CTGTCAAAGCCGTCTACAATACCGATATTATGATATAGCTGAC-3'    |
| Q $\beta$ <sub>A1930G</sub> | 5'-TAATGCTGTTGAACTCCGGCCTCGCGAATTTGATG-3'<br>5'-CATCAAATTCGCGAGGCCGGAGTTCAACAGCATT-3'                     |
| Q $\beta$ <sub>C2228U</sub> | 5'- GATGGCGTGATAGTTGG <b>T</b> TTTTGGCGCGATCCATC-3'<br>5'- GATGGATCGCGCCAAAA <b>A</b> CCAATATCACGCCATC-3' |
| Q $\beta$ <sub>U3311G</sub> | 5'-GTTGTTACCTACGAGAAGAT <b>G</b> TCTTCTATGGGTAACGG-3'<br>5'-CCGTTACCCATAGAAGACATCTTCTCGTAGGTAACAAC-3'     |

<sup>1</sup>The position mutated (with respect to the virus Q $\beta$ <sub>WT</sub>) is indicated in bold.
