# Supplementary material for: Standing Genetic Diversity and Transmission Bottleneck Size Drive Adaptation in Bacteriophage Qβ
Source: MDPI journal article supplement (doi:10.3390/ijms23168876), 2022-08-09
Supplement: s1 [file s1]

**Table S2.** Mutations present in the consensus sequences of the evolutionary lineages evolved at 43 °C from population Q $\beta$ -t25.

| Mutation <sup>1</sup> | Transmission bottleneck size (pfu)/Evolutionary lineage |                     |                     |                     |                     |                     |                     |                     |                     |                     |
|-----------------------|---------------------------------------------------------|---------------------|---------------------|---------------------|---------------------|---------------------|---------------------|---------------------|---------------------|---------------------|
|                       | 10 <sup>3</sup> /L1                                     | 10 <sup>3</sup> /L2 | 10 <sup>4</sup> /L1 | 10 <sup>4</sup> /L2 | 10 <sup>5</sup> /L1 | 10 <sup>5</sup> /L2 | 10 <sup>6</sup> /L1 | 10 <sup>6</sup> /L2 | 10 <sup>7</sup> /L1 | 10 <sup>7</sup> /L2 |
| C267U                 | -                                                       | -                   | -                   | -                   | +                   | -                   | -                   | -                   | -                   | -                   |
| C343U                 | -                                                       | -                   | -                   | -                   | -                   | -                   | -                   | +                   | -                   | -                   |
| U609C                 | -                                                       | -                   | -                   | -                   | +                   | -                   | -                   | -                   | -                   | -                   |
| A1088G                | -                                                       | -                   | +                   | -                   | +                   | +                   | +                   | +                   | +                   | +                   |
| U1295C                | -                                                       | -                   | -                   | -                   | -                   | -                   | -                   | -                   | +                   | -                   |
| G1312A                | -                                                       | -                   | -                   | -                   | -                   | -                   | -                   | +                   | -                   | -                   |
| G1371A                | -                                                       | -                   | -                   | -                   | -                   | -                   | -                   | +                   | -                   | -                   |
| C1649U                | -                                                       | -                   | -                   | -                   | -                   | +                   | +                   | -                   | +                   | +                   |
| U1665C                | -                                                       | -                   | -                   | -                   | -                   | -                   | +                   | -                   | -                   | -                   |
| A1827G                | +                                                       | -                   | -                   | -                   | +                   | -                   | -                   | +                   | -                   | -                   |
| G1835U                | -                                                       | -                   | -                   | -                   | -                   | -                   | -                   | -                   | +                   | -                   |
| A1930G                | +                                                       | +                   | -                   | +                   | -                   | -                   | -                   | -                   | -                   | -                   |
| U2016C                | -                                                       | -                   | -                   | -                   | -                   | +                   | +                   | -                   | +                   | +                   |
| U2135C                | -                                                       | -                   | -                   | -                   | -                   | -                   | -                   | +                   | -                   | -                   |
| A2222C                | -                                                       | -                   | -                   | -                   | +                   | +                   | +                   | +                   | +                   | +                   |
| C2228U                | +                                                       | +                   | +                   | +                   | -                   | -                   | -                   | -                   | -                   | -                   |
| U2766C                | -                                                       | +                   | -                   | -                   | -                   | -                   | -                   | -                   | -                   | -                   |
| C3201A                | -                                                       | -                   | +                   | +                   | -                   | -                   | -                   | -                   | -                   | -                   |
| U3311G                | -                                                       | -                   | -                   | -                   | +                   | +                   | +                   | +                   | +                   | +                   |
| U3317C                | -                                                       | -                   | -                   | -                   | -                   | -                   | +                   | -                   | -                   | -                   |
| U3447C                | -                                                       | -                   | -                   | -                   | +                   | -                   | -                   | -                   | -                   | -                   |
| U3761C                | -                                                       | -                   | -                   | -                   | -                   | -                   | +                   | -                   | -                   | -                   |
| U3784C                | +                                                       | -                   | -                   | -                   | -                   | -                   | -                   | -                   | -                   | -                   |
| C3879A                | -                                                       | +                   | -                   | -                   | -                   | -                   | -                   | -                   | -                   | -                   |
| C3903U                | -                                                       | -                   | -                   | -                   | -                   | -                   | +                   | -                   | -                   | -                   |
| G3945A                | -                                                       | -                   | -                   | -                   | -                   | +                   | +                   | -                   | +                   | +                   |
| G3959A                | -                                                       | -                   | +                   | -                   | -                   | -                   | -                   | -                   | -                   | -                   |
| U3968C                | -                                                       | -                   | -                   | -                   | -                   | -                   | +                   | -                   | -                   | -                   |
| C4025U                | +                                                       | -                   | -                   | -                   | -                   | -                   | -                   | -                   | -                   | -                   |
| C4134U                | -                                                       | -                   | -                   | -                   | +                   | -                   | -                   | -                   | -                   | -                   |

<sup>1</sup>The sign – refers to the absence of the indicated mutation and the sign + its presence in the corresponding evolutionary lineage.
